# Supplementary material for: Transcriptomic signatures differentiate survival from fatal outcomes in humans infected with Ebola virus
Source: PubMed Central journal article supplement (PMC5244546; doi:10.1186/s13059-016-1137-3), 2017-01-19
Supplement: 13059_2016_1137_MOESM9_ESM.pdf [file 13059_2016_1137_MOESM9_ESM.pdf]

## Additional File 9

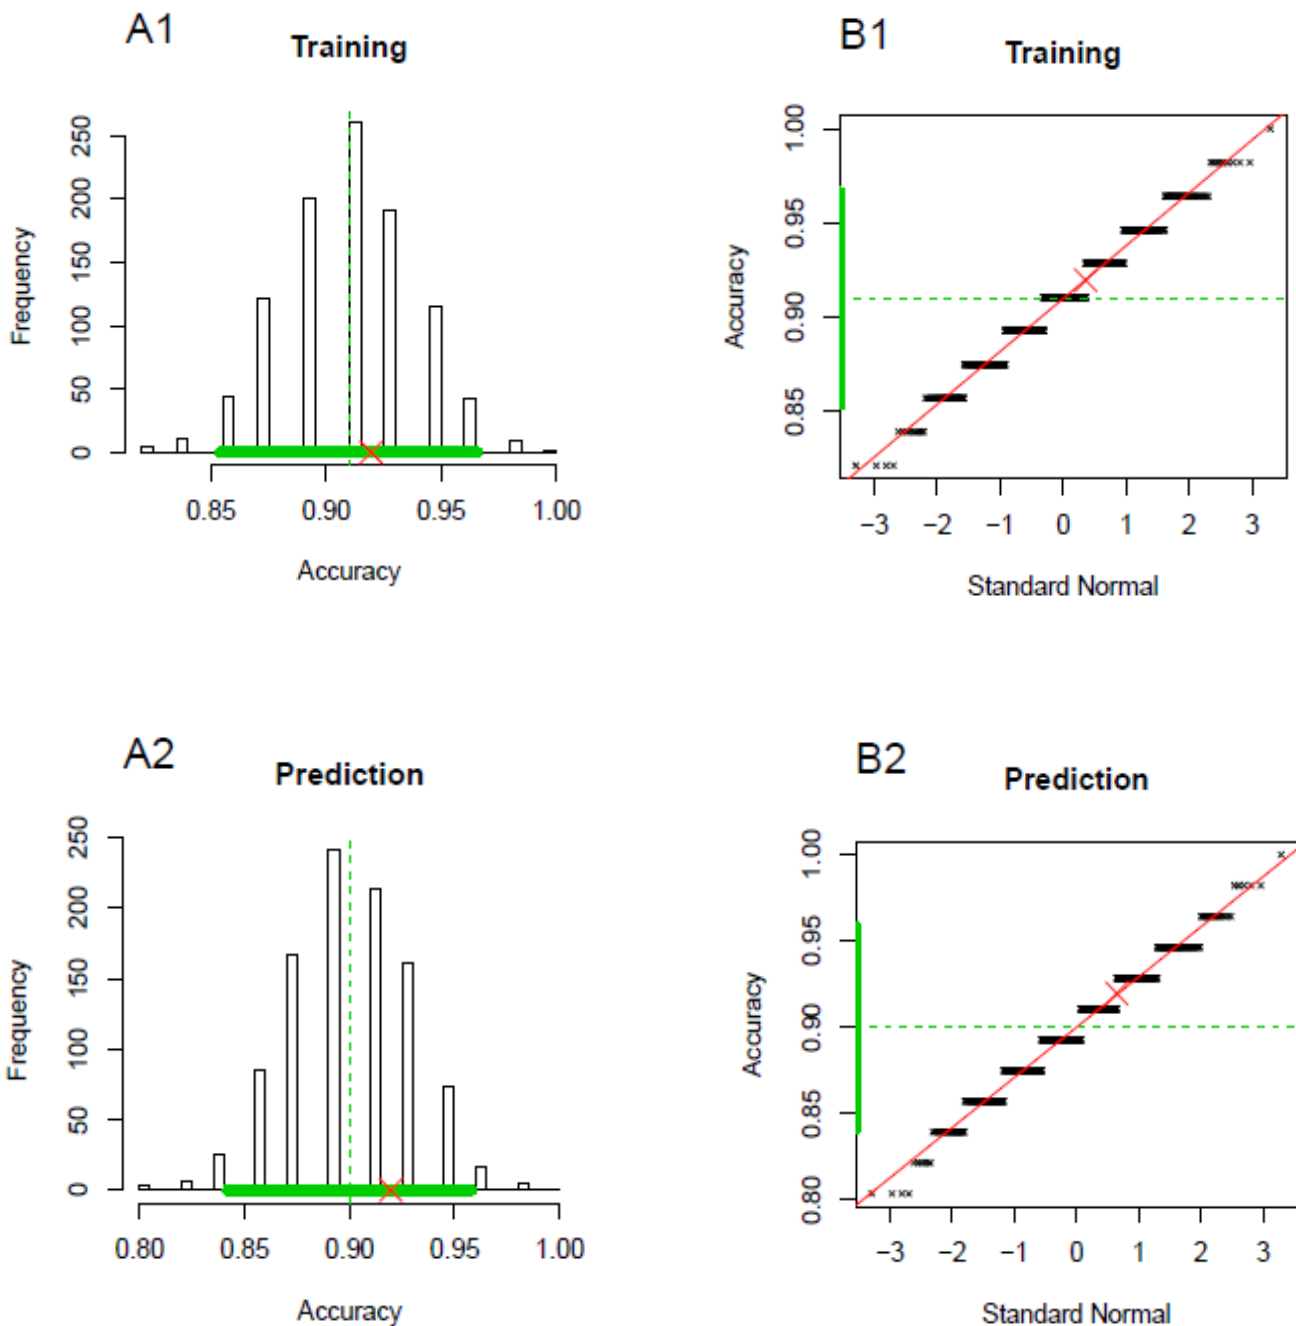

### Figure Legend :

Outcome of predictive models for the Random Forest (RF) predictive method. Panels A1 and B1 indicate the frequency and accuracy distribution, respectively, of the resampling 1000 times of a training set comprising 50% of the entire dataset. Panels A2 and B2 displays the corresponding outcome of applying the training model to the remaining 50% of patients. For the A panels the dashed vertical line represents the mean value, and the thick horizontal green line represents the 95% confidence intervals (C.I.'s). The B panels present QQplots of accuracy as a function of a standard normal distribution for which a linear relationship is indicative of the data having a normal distribution. Again the thick and dashed thin green line have the same meaning as in panels A1 and 2.
